# Supplementary material for: A Strategy for Uncovering the Serum Metabolome by Direct-Infusion High-Resolution Mass Spectrometry
Source: MDPI journal article supplement (doi:10.3390/metabo13030460), 2023-03-22
Supplement: s1 [file s1]

## Supporting Information

### A Strategy for Uncovering the Serum Metabolome by Direct-Infusion High-resolution Mass Spectrometry

Xiaoshan Sun <sup>1,2,3</sup>, Zhen Jia <sup>1,3,4</sup>, Yuqing Zhang <sup>1,3,5</sup>, Xinjie Zhao <sup>1,2,3</sup>, Chunxia Zhao <sup>1,2,3</sup>, Xin Lu <sup>1,2,3,\*</sup> and Guowang Xu <sup>1,2,3,\*</sup>

<sup>1</sup> CAS Key Laboratory of Separation Science for Analytical Chemistry, Dalian Institute of Chemical Physics, Chinese Academy of Sciences, Dalian 116023, China; sunxiaoshan2015@dicp.ac.cn (X.S.); jiazhen@dicp.ac.cn (Z.J.); yuqingzhang@dicp.ac.cn (Y.Z.); xj\_zhao@dicp.ac.cn (X.Z.); zhaoctx@dicp.ac.cn (C.Z.)

<sup>2</sup> University of Chinese Academy of Sciences, Beijing 100049, China

<sup>3</sup> Liaoning Province Key Laboratory of Metabolomics, Dalian 116023, China

<sup>4</sup> Department of Cell Biology, College of Life Sciences, China Medical University, Shenyang 110122, China

<sup>5</sup> Zhang Dayu School of Chemistry, Dalian University of Technology, Dalian 116024, China

\* Correspondence: luxin001@dicp.ac.cn (X.L.); xugw@dicp.ac.cn (G.X.)

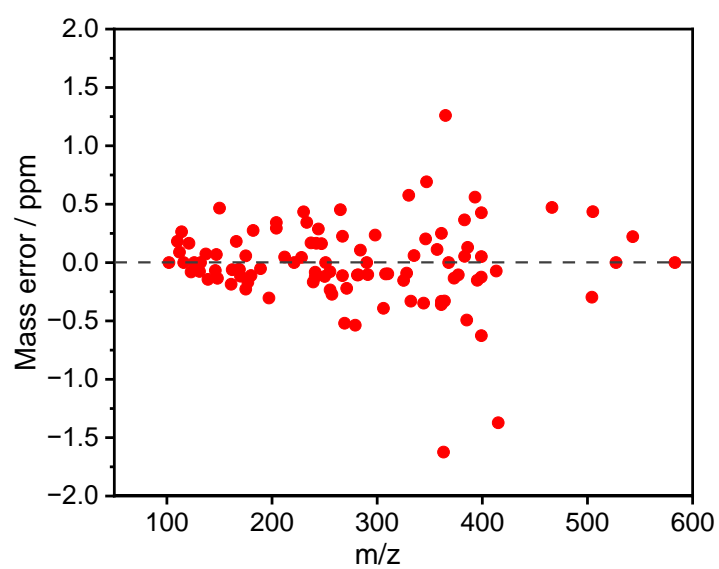

**Figure S1.** Mass error distribution of the 101 monoisotopic MS features related to the reference compounds in the standard mixture

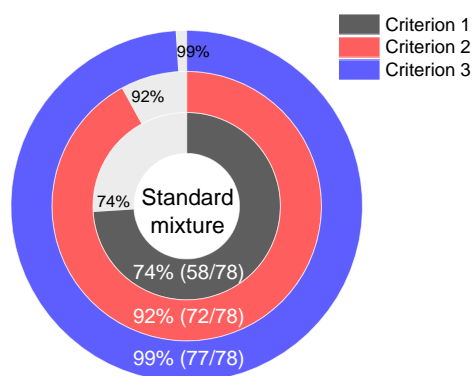

**Figure S2.** The overlap between standards and metabolites filtering using criterion 1, criterion 2 and criterion 3, respectively. Criteria 1, 2 and 3 represent endogenous metabolites from blood, endogenous metabolites, and all metabolites in the HMDB database, respectively.

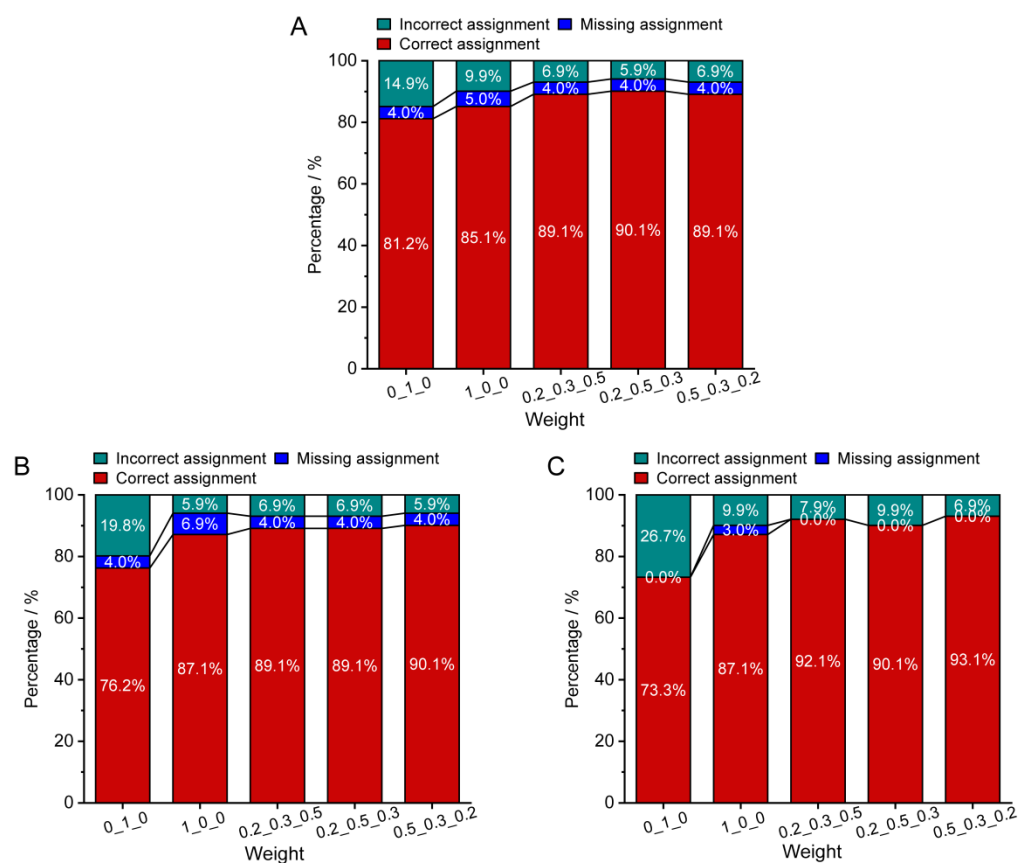

**Figure S3.** The effects of the weight coefficients on formula assignments in the standard mixture using three initial networks constructed by criterion 1 (A), criterion 2 (B), and criterion 3 (C).  $W_{\text{degree}}W_{m/z}W_{\text{iso}}$  of the  $x$ -axis represents weight coefficients of degree, mass accuracy, and isotopic distribution, respectively.

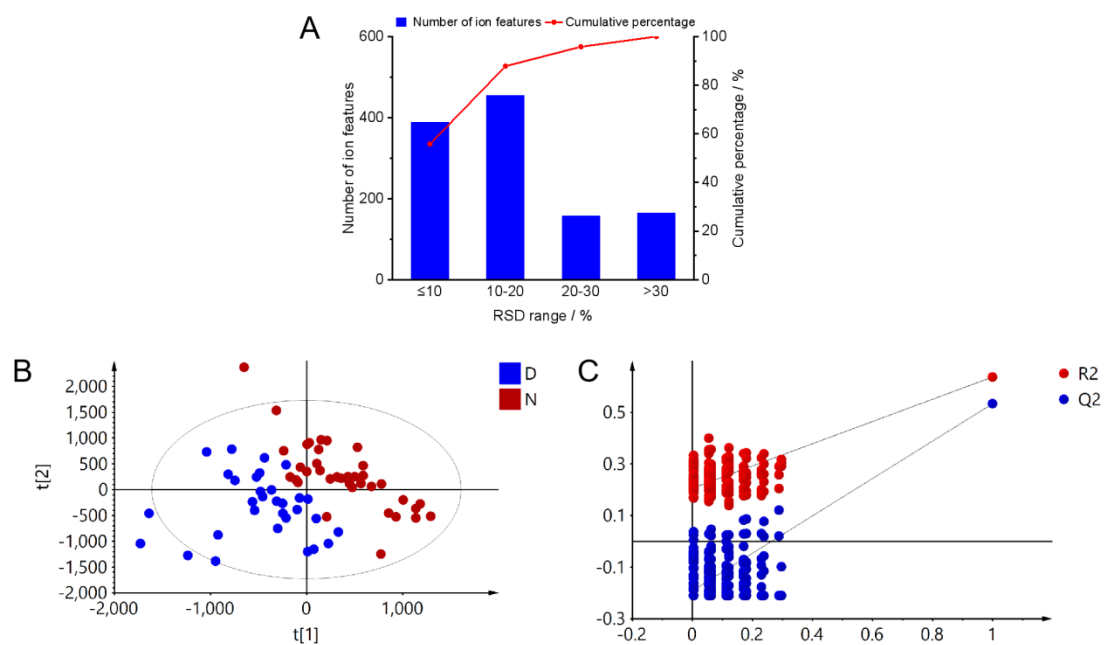

**Figure S4.** (A) The RSD distribution of MS features in QCs. (B) PLS-DA score plot of healthy control (red dots) and diabetes patients (blue dots). (C) Cross-validation plots of the PLS-DA model with 200 times permutation tests.

**Table S1.** Detailed information on 78 metabolites standards

| No | Name                                       | Formula     | Monoisotopic mass |
|----|--------------------------------------------|-------------|-------------------|
| 1  | 1-Aminocyclopropane-1-Carboxylate          | C4H7NO2     | 101.0477          |
| 2  | 2-Aminophenol                              | C6H7NO      | 109.0528          |
| 3  | Cytosine                                   | C4H5N3O     | 111.0433          |
| 4  | Creatinine                                 | C4H7N3O     | 113.0589          |
| 5  | L-Proline                                  | C5H9NO2     | 115.0633          |
| 6  | Purine                                     | C5H4N4      | 120.0436          |
| 7  | Nicotinamide                               | C6H6N2O     | 122.0480          |
| 8  | Creatine                                   | C4H9N3O2    | 131.0695          |
| 9  | Hypoxanthine                               | C5H4N4O     | 136.0385          |
| 10 | Urocanate                                  | C6H6N2O2    | 138.0429          |
| 11 | 4-Guanidinobutanoate                       | C5H11N3O2   | 145.0851          |
| 12 | Dimethylbenzimidazole                      | C9H10N2     | 146.0844          |
| 13 | 3-Methyl-2-Oxindole                        | C9H9NO      | 147.0684          |
| 14 | 3-Methyladenine                            | C6H7N5      | 149.0701          |
| 15 | Tryptamine                                 | C10H12N2    | 160.1000          |
| 16 | 5-Methylcytosine Hydrochloride             | C5H7N3O     | 125.0589          |
| 17 | L-Phenylalanine                            | C9H11NO2    | 165.0790          |
| 18 | N-Acetylputrescine                         | C6H14N2O    | 130.1106          |
| 19 | Amylose                                    | C14H26O11   | 370.1475          |
| 20 | N(Pai)-Methyl-L-Histidine                  | C7H11N3O2   | 169.0851          |
| 21 | N-Omega-Methyltryptamine                   | C11H14N2    | 174.1157          |
| 22 | Indole-3-Acetamide                         | C10H10N2O   | 174.0793          |
| 23 | L-Tyrosine                                 | C9H11NO3    | 181.0739          |
| 24 | Deoxycarnitine                             | C7H15NO2    | 145.1103          |
| 25 | Nalpha-Acetyl-L-Lysine                     | C8H16N2O3   | 188.1161          |
| 26 | L-Carnitine                                | C7H15NO3    | 161.1052          |
| 27 | 3-Methoxytyramine                          | C9H13NO2    | 167.0946          |
| 28 | Ethyl 3-Indoleacetate                      | C12H13NO2   | 203.0946          |
| 29 | N-Acetyl-L-Phenylalanine                   | C11H13NO3   | 207.0895          |
| 30 | Serotonin                                  | C10H12N2O   | 176.0950          |
| 31 | Dethiobiotin                               | C10H18N2O3  | 214.1317          |
| 32 | Omega-Hydroxydodecanoic Acid               | C12H24O3    | 216.1725          |
| 33 | N-Acetylserotonin                          | C12H14N2O2  | 218.1055          |
| 34 | 5-Hydroxy-L-Tryptophan                     | C11H12N2O3  | 220.0848          |
| 35 | Nepsilon,Nepsilon,Nepsilon-Trimethyllysine | C9H20N2O2   | 188.1525          |
| 36 | Deoxycytidine                              | C9H13N3O4   | 227.0906          |
| 37 | Deoxyuridine                               | C9H12N2O5   | 228.0746          |
| 38 | Melatonin                                  | C13H16N2O2  | 232.1212          |
| 39 | L-Tryptophanamide                          | C11H13N3O   | 203.1059          |
| 40 | O-Acetyl-L-Carnitine                       | C9H17NO4    | 203.1158          |
| 41 | Pyridoxamine                               | C8H12N2O2   | 168.0899          |
| 42 | Thymidine                                  | C10H14N2O5  | 242.0903          |
| 43 | Cytidine                                   | C9H13N3O5   | 243.0855          |
| 44 | Uridine                                    | C9H12N2O6   | 244.0695          |
| 45 | Biotin                                     | C10H16N2O3S | 244.0882          |
| 46 | N-Acetyl-D-Tryptophan                      | C13H14N2O3  | 246.1004          |
| 47 | 3-Methoxy-L-Tyrosine                       | C10H13NO4   | 211.0845          |

| No | Name                                                                   | Formula     | Monoisotopic mass |
|----|------------------------------------------------------------------------|-------------|-------------------|
| 48 | Palmitoleic Acid                                                       | C16H30O2    | 254.2246          |
| 49 | 1-Methyl-6,7-Dihydroxy-1,2,3,4-Tetrahydroisoquinoline                  | C10H13NO2   | 179.0946          |
| 50 | Inosine                                                                | C10H12N4O5  | 268.0808          |
| 51 | Gamma-Linolenic Acid                                                   | C18H30O2    | 278.2246          |
| 52 | Linoleate                                                              | C18H32O2    | 280.2402          |
| 53 | 1-Methyladenosine                                                      | C11H15N5O4  | 281.1124          |
| 54 | Guanosine                                                              | C10H13N5O5  | 283.0917          |
| 55 | Ophthalmic Acid                                                        | C11H19N3O6  | 289.1274          |
| 56 | 5'-Methylthioadenosine                                                 | C11H15N5O3S | 297.0896          |
| 57 | Rac-Glycerol 1-Myristate                                               | C17H34O4    | 302.2457          |
| 58 | L-Anserine                                                             | C10H16N4O3  | 240.1222          |
| 59 | 2'-Deoxycytidine 5'-Monophosphate                                      | C9H14N3O7P  | 307.0569          |
| 60 | N-Acetylneuraminate                                                    | C11H19NO9   | 309.1060          |
| 61 | Uridine-5-Monophosphate                                                | C9H13N2O9P  | 324.0359          |
| 62 | Cytidine 2',3'-Cyclic Mono-Phosphate                                   | C9H12N3O7P  | 305.0413          |
| 63 | Nicotinamide Mononucleotide                                            | C11H15N2O8P | 334.0566          |
| 64 | 5-Aminoimidazole-4-Carboxamide-1-Beta-D-Ribofuranosyl 5'-Monophosphate | C9H15N4O8P  | 338.0628          |
| 65 | Lauroylcarnitine                                                       | C19H37NO4   | 343.2723          |
| 66 | Rosmarinic Acid                                                        | C18H16O8    | 360.0845          |
| 67 | Cortisone                                                              | C21H28O5    | 360.1937          |
| 68 | Cortisol                                                               | C21H30O5    | 362.2093          |
| 69 | Guanosine 3',5'-Cyclic Monophosphate                                   | C10H12N5O7P | 345.0474          |
| 70 | Deoxycorticosterone Acetate                                            | C23H32O4    | 372.2301          |
| 71 | Riboflavin                                                             | C17H20N4O6  | 376.1383          |
| 72 | Bis(2-Ethylhexyl)Phthalate                                             | C24H38O4    | 390.2770          |
| 73 | Xanthosine 5'-Monophosphate                                            | C10H13N4O9P | 364.0420          |
| 74 | Guanosine 5'-Monophosphate                                             | C10H14N5O8P | 363.0580          |
| 75 | Glycocholate                                                           | C26H43NO6   | 465.3090          |
| 76 | S-(5'-Adenosyl)-L-Methionine                                           | C15H22N6O5S | 398.1372          |
| 77 | D-(+)-Raffinose                                                        | C18H32O16   | 504.1690          |
| 78 | Biliverdin                                                             | C33H34N4O6  | 582.2478          |

Table S2. Detailed information on internal standards

| Reference Compounds            | m/z (positive mode) | Formula                                                                     | Concentration (µg/mL) |
|--------------------------------|---------------------|-----------------------------------------------------------------------------|-----------------------|
| Phe-d <sub>5</sub>             | 171.11764           | C <sub>9</sub> H <sub>6</sub> D <sub>5</sub> NO <sub>2</sub>                | 2.2                   |
| Trp-d <sub>5</sub>             | 210.12854           | C <sub>11</sub> H <sub>7</sub> D <sub>5</sub> N <sub>2</sub> O <sub>2</sub> | 4.0                   |
| Leu-d <sub>3</sub>             | 135.12074           | C <sub>6</sub> H <sub>10</sub> D <sub>3</sub> NO <sub>2</sub>               | 2.4                   |
| Glutamine-d <sub>5</sub>       | 152.10780           | C <sub>5</sub> H <sub>5</sub> D <sub>5</sub> N <sub>2</sub> O <sub>3</sub>  | 5.0                   |
| CDCA-d <sub>4</sub>            | 379.31448           | C <sub>24</sub> H <sub>36</sub> D <sub>4</sub> O <sub>4</sub>               | 10                    |
| Choline-d <sub>4</sub>         | 108.13210           | C <sub>5</sub> H <sub>9</sub> D <sub>4</sub> NO                             | 0.3                   |
| Carnitine C2:0-d <sub>3</sub>  | 207.14186           | C <sub>9</sub> H <sub>14</sub> D <sub>3</sub> NO <sub>4</sub>               | 0.3                   |
| Carnitine C12:0-d <sub>3</sub> | 347.29836           | C <sub>19</sub> H <sub>34</sub> D <sub>3</sub> NO <sub>4</sub>              | 0.3                   |
| Carnitine C16:0-d <sub>3</sub> | 403.36097           | C <sub>23</sub> H <sub>42</sub> D <sub>3</sub> NO <sub>4</sub>              | 0.3                   |



Table S3. Clinical information of participants

| The clinical parameters  | Diabetes   | Control    |
|--------------------------|------------|------------|
| Gender (male/female)     | 23/8       | 27/11      |
| Age (years)              | 58±9       | 55±9       |
| BMI (kg/m <sup>2</sup> ) | 22.66±6.42 | 23.03±2.35 |
| Systolic BP (mm Hg)      | 124±9      | 122±9      |
| Diastolic BP (mm Hg)     | 76±6       | 75±7       |
| Blood glucose (mmol/L)   | 9.01±2.10  | 5.58±0.42  |
| TG (mmol/L)              | 4.79±0.84  | 4.96±0.67  |
| TG (mmol/L)              | 1.75±0.71  | 1.39±0.41  |
| HDL-c (mmol/L)           | 1.24±0.27  | 1.34±0.24  |
| LDL-c (mmol/L)           | 2.61±0.74  | 2.78±0.5   |

The clinical parameters are presented as mean ± SD

Table S4. The results of method linearity

| Compound ID         | m/z       | Linearity          | Linear range ng/ml | R <sup>2</sup> |
|---------------------|-----------|--------------------|--------------------|----------------|
| Phenylalanine       | 166.08625 | $y=0.1717x+1.0012$ | 5-25000            | 1              |
| Tryptophan          | 205.09715 | $y=1.8661x-409.68$ | 50-25000           | 0.9996         |
| Leucine             | 132.10190 | $y=1.4129x+132.19$ | 5-25000            | 0.9999         |
| Cholic acid         | 409.29485 | $y=0.0002x-0.1034$ | 250-25000          | 0.9975         |
| Methionine-(methyl) | 150.05833 | $y=0.1699x+14.402$ | 5-25000            | 0.9999         |
| Pro-leu             | 229.15467 | $y=0.1503x+0.8896$ | 25-25000           | 0.9998         |
| Phe-glutamine       | 265.11828 | $y=0.0654x+2.7412$ | 5-25000            | 1              |
| Methyl-glutamine    | 162.07608 | $y=0.0588x-3.884$  | 50-25000           | 0.9999         |
| LPC 16:0            | 496.33977 | $y=0.0407x-7.1806$ | 50-5000            | 0.9979         |
| Carnitine C8:0-d3   | 291.23576 | $y=8.1911x-90.902$ | 5-25000            | 0.9999         |

Table S5. Seventy-six commonly encountered reactions in biological systems

| Reaction Type  | Description                 |                                 |
|----------------|-----------------------------|---------------------------------|
| H2             | dehydrogenation             | hydrogenation                   |
| CH2            | demethylation               | methylation                     |
| NH             | loss of NH                  | addition of NH                  |
| O              | loss of oxygen              | Oxidation                       |
| NH3            | loss of ammonia             | addition of ammonia             |
| H2O            | loss of water               | addition of water               |
| CO             | loss of CO                  | addition of CO                  |
| C2H4           | loss of C2H4                | addition of C2H4                |
| C2H2O          | Deacetylation               | Acetylation                     |
| CO2            | loss of CO2                 | addition of CO2                 |
| C2H3NO         | loss of glycine             | glycine conjugation             |
| SO3            | loss of sulfate             | sulfate conjugation             |
| HPO3           | loss of Phosphate           | addition of Phosphate           |
| C4H3N3         | loss of Cytosine            | addition of Cytosine            |
| C4H2N2O        | loss of Uracil              | addition of Uracil              |
| C3H5NOS        | loss of cysteine            | cysteine conjugation            |
| C2H5NO2S       | loss of taurine             | taurine conjugation             |
| C5H4N2O        | loss of Thymine             | addition of Thymine             |
| C3H5NO2S       | loss of S-cysteine          | S-cysteine conjugation          |
| C5H8O4         | loss of D-ribose            | addition of D-ribose            |
| C5H3N5         | loss of Guanine             | addition of Guanine             |
| C7H13NO2       | loss of Carnitine           | addition of Carnitine           |
| C5H7NO3S       | loss of N-acetyl-S-cysteine | addition of N-acetyl-S-cysteine |
| C6H10O5        | loss of Hexose              | addition of Hexose              |
| C6H8O6         | loss of glucuronic acid     | addition of glucuronic acid     |
| C10H12N2O4     | loss of Thymidine           | addition of Thymidine           |
| C9H11N3O4      | loss of Cytidine            | addition of Cytidine            |
| C9H10N2O5      | loss of Uridine             | addition of Uridine             |
| C16H30O        | loss of Palmitic acid       | addition of Palmitic acid       |
| C6H11O8P       | loss of Glucose-6-phosphate | addition of Glucose-6-phosphate |
| C10H11N5O3     | loss of Adenosine           | addition of Adenosine           |
| C10H11N5O4     | loss of Guanosine           | addition of Guanosine           |
| C10H15N3O5S    | loss of Glutathione         | addition of Glutathione         |
| C10H15N3O6S    | loss of S-Glutathione       | addition of S-Glutathione       |
| C12H20O10      | loss of di-hexose           | addition of di-hexose           |
| C18H30O15      | loss of tri-hexose          | addition of tri-hexose          |
| SH→SO3H        | Sulfonic acid to Thiol      | Thiol to Sulfonic acid          |
| (C5H5N5 - H2O) | loss of Adenine             | addition of Adenine             |

Table S6. The significantly changed features between healthy control and T2D patients

| Neutral formula | m/z       | Adduct type         | P-value  | Fold change (T2D/control) |   |
|-----------------|-----------|---------------------|----------|---------------------------|---|
| C9H14O2S        | 225.03415 | [M+K] <sup>+</sup>  | 4.76E-03 | 1.49                      | ↑ |
| C8H15NO6        | 244.07896 | [M+Na] <sup>+</sup> | 1.89E-08 | 1.59                      | ↑ |
| C6H15NO6        | 198.09689 | [M+H] <sup>+</sup>  | 1.83E-05 | 2.18                      | ↑ |
| C6H13NO2        | 132.10178 | [M+H] <sup>+</sup>  | 1.57E-03 | 1.17                      | ↑ |
|                 | 154.0836  | [M+Na] <sup>+</sup> | 4.93E-02 | 1.16                      | ↑ |
| C6H12O6         | 203.05231 | [M+Na] <sup>+</sup> | 2.34E-11 | 1.46                      | ↑ |
| C6H10O5         | 185.04175 | [M+Na] <sup>+</sup> | 2.59E-07 | 1.63                      | ↑ |
| C5H9NO4         | 148.06021 | [M+H] <sup>+</sup>  | 5.74E-03 | 1.22                      | ↑ |
| C5H9NO2         | 138.05238 | [M+Na] <sup>+</sup> | 2.73E-02 | 1.23                      | ↑ |
| C5H9NO          | 100.07552 | [M+H] <sup>+</sup>  | 5.53E-03 | 1.40                      | ↑ |
|                 | 122.05748 | [M+Na] <sup>+</sup> | 4.09E-03 | 1.44                      | ↑ |
| C5H11NO2        | 118.08608 | [M+H] <sup>+</sup>  | 2.81E-02 | 1.10                      | ↑ |
| C4H8O4          | 143.03131 | [M+Na] <sup>+</sup> | 3.22E-06 | 1.54                      | ↑ |
| C4H8O3          | 127.03638 | [M+Na] <sup>+</sup> | 9.17E-03 | 1.86                      | ↑ |
| C4H6O3          | 125.02076 | [M+Na] <sup>+</sup> | 2.81E-02 | 1.25                      | ↑ |
| C3H7NO2         | 90.05489  | [M+H] <sup>+</sup>  | 3.90E-05 | 1.23                      | ↑ |
|                 | 112.03671 | [M+Na] <sup>+</sup> | 4.09E-03 | 1.26                      | ↑ |
| C3H6O3          | 113.02072 | [M+Na] <sup>+</sup> | 1.71E-03 | 1.27                      | ↑ |
| C34H56O6        | 561.4137  | [M+H] <sup>+</sup>  | 4.08E-04 | 1.71                      | ↑ |
| C24H18O6        | 441.07416 | [M+K] <sup>+</sup>  | 1.12E-09 | 2.71                      | ↑ |
| C21H40O4        | 379.28149 | [M+Na] <sup>+</sup> | 3.79E-03 | 1.63                      | ↑ |
| C21H38O4        | 377.26587 | [M+Na] <sup>+</sup> | 2.46E-03 | 1.57                      | ↑ |
| C20H21NO6       | 372.14307 | [M+H] <sup>+</sup>  | 7.50E-05 | 1.52                      | ↑ |
| C20H20O12       | 453.10309 | [M+H] <sup>+</sup>  | 2.76E-07 | 1.58                      | ↑ |
| C20H19NO7       | 386.12286 | [M+H] <sup>+</sup>  | 4.50E-11 | 2.17                      | ↑ |
| C20H17N3O8      | 466.06418 | [M+K] <sup>+</sup>  | 2.10E-05 | 1.61                      | ↑ |
| C19H22N2O10S    | 509.06198 | [M+K] <sup>+</sup>  | 5.91E-07 | 2.32                      | ↑ |
| C18H22O7S       | 383.11551 | [M+H] <sup>+</sup>  | 1.85E-12 | 2.11                      | ↑ |
|                 | 405.09744 | [M+Na] <sup>+</sup> | 1.42E-11 | 2.26                      | ↑ |
| C18H22N2O8      | 395.14456 | [M+H] <sup>+</sup>  | 3.78E-08 | 1.61                      | ↑ |
| C18H20N2O9      | 409.12372 | [M+H] <sup>+</sup>  | 4.27E-04 | 1.54                      | ↑ |
| C18H20N2O8S     | 463.05612 | [M+K] <sup>+</sup>  | 2.00E-06 | 2.40                      | ↑ |
| C17H16N2O5S     | 399.04034 | [M+K] <sup>+</sup>  | 6.22E-06 | 2.14                      | ↑ |
| C16H30O7        | 373.16263 | [M+K] <sup>+</sup>  | 1.11E-07 | 1.70                      | ↑ |
| C16H28O8        | 387.14175 | [M+K] <sup>+</sup>  | 9.71E-08 | 1.73                      | ↑ |
| C16H21N3O7      | 406.10095 | [M+K] <sup>+</sup>  | 2.54E-06 | 2.52                      | ↑ |
| C16H20N4O9S     | 467.08347 | [M+Na] <sup>+</sup> | 7.12E-07 | 1.47                      | ↑ |
| C16H19NO11      | 440.05942 | [M+K] <sup>+</sup>  | 1.36E-04 | 1.65                      | ↑ |
| C16H19N3O11S    | 500.03632 | [M+K] <sup>+</sup>  | 1.50E-10 | 2.82                      | ↑ |
| C16H16N6O7      | 443.0712  | [M+K] <sup>+</sup>  | 8.89E-10 | 2.81                      | ↑ |
| C15H22N2O9S     | 407.11139 | [M+H] <sup>+</sup>  | 4.20E-06 | 1.76                      | ↑ |
| C15H14N2O8S     | 383.05371 | [M+H] <sup>+</sup>  | 5.55E-07 | 1.75                      | ↑ |

| Neutral formula | m/z       | Adduct type         | P-value  | Fold change (T2D/control) |   |
|-----------------|-----------|---------------------|----------|---------------------------|---|
| C15H14N2O5S     | 373.02454 | [M+K] <sup>+</sup>  | 2.17E-05 | 1.65                      | ↑ |
| C13H22O5S       | 329.08142 | [M+K] <sup>+</sup>  | 9.02E-06 | 2.97                      | ↑ |
| C13H15N3O4      | 316.06943 | [M+K] <sup>+</sup>  | 8.10E-09 | 2.01                      | ↑ |
| C13H12O3S       | 271.03967 | [M+Na] <sup>+</sup> | 3.80E-07 | 1.49                      | ↑ |
|                 | 287.01373 | [M+K] <sup>+</sup>  | 9.02E-06 | 1.54                      | ↑ |
| C12H25NO8       | 334.14682 | [M+Na] <sup>+</sup> | 4.05E-08 | 1.93                      | ↑ |
| C12H20O5S       | 315.06589 | [M+K] <sup>+</sup>  | 1.08E-08 | 1.93                      | ↑ |
| C12H18O13       | 393.06265 | [M+Na] <sup>+</sup> | 2.29E-05 | 1.48                      | ↑ |
| C11H23NO8       | 320.13126 | [M+Na] <sup>+</sup> | 1.67E-06 | 1.90                      | ↑ |
| C11H11N3O3      | 272.04312 | [M+K] <sup>+</sup>  | 1.65E-07 | 1.55                      | ↑ |
| C10H19N3O7      | 316.11124 | [M+Na] <sup>+</sup> | 2.03E-04 | 1.63                      | ↑ |
| C7H15NO3        | 162.11226 | [M+H] <sup>+</sup>  | 3.18E-02 | 0.84                      | ↓ |
| C7H14O          | 137.09354 | [M+Na] <sup>+</sup> | 3.13E-02 | 0.82                      | ↓ |
| C7H13NO2        | 144.10172 | [M+H] <sup>+</sup>  | 4.96E-04 | 0.30                      | ↓ |
|                 | 166.08366 | [M+Na] <sup>+</sup> | 6.92E-04 | 0.28                      | ↓ |
| C6H12O5         | 187.05737 | [M+Na] <sup>+</sup> | 1.68E-11 | 0.26                      | ↓ |
| C6H11NO2        | 152.06796 | [M+Na] <sup>+</sup> | 3.48E-02 | 0.74                      | ↓ |
| C28H44          | 419.3064  | [M+K] <sup>+</sup>  | 1.93E-02 | 0.94                      | ↓ |
| C21H34O2        | 341.24478 | [M+Na] <sup>+</sup> | 2.73E-02 | 0.76                      | ↓ |
| C20H39NO4       | 358.29471 | [M+H] <sup>+</sup>  | 2.81E-02 | 0.70                      | ↓ |
| C13H12O2S       | 255.04477 | [M+Na] <sup>+</sup> | 9.83E-12 | 0.22                      | ↓ |
